# Supplementary material
Source: PubMed Central journal article supplement (PMC263858)

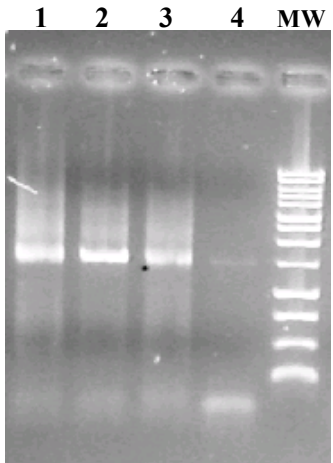

Supplement: pnas_100_23_13591__2.pdf [file pnas_100_23_13591__2.pdf]

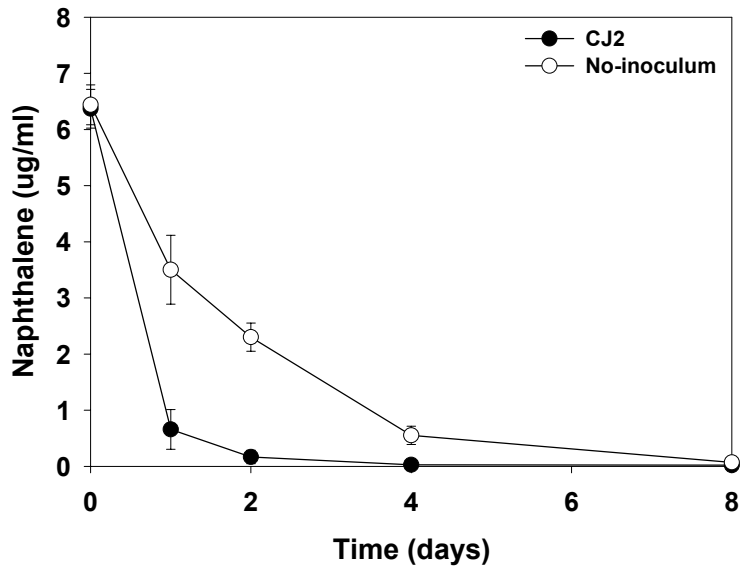

Supplement: pnas_100_23_13591__5.pdf [file pnas_100_23_13591__5.pdf]
